# Supplementary material for: Sex Differences in the Default Mode Network with Regard to Autism Spectrum Traits: A Resting State fMRI Study
Source: PubMed Central journal article supplement (PMC4658035; doi:10.1371/journal.pone.0143126), 2015-11-24
Supplement: pone.0143126.s001.pdf [file pone.0143126.s001.pdf]

| Male        | AGE         | AQ-S       | AQ-AS      | AQ-AD      | AQ-C       | AQ-I       | AQTotal     |
|-------------|-------------|------------|------------|------------|------------|------------|-------------|
| M01         | 19          | 5          | 3          | 5          | 2          | 3          | 18          |
| M02         | 22          | 2          | 7          | 5          | 4          | 5          | 23          |
| M03         | 22          | 3          | 5          | 6          | 4          | 3          | 21          |
| M04         | 19          | 8          | 6          | 7          | 7          | 3          | 31          |
| M05         | 22          | 0          | 3          | 2          | 0          | 4          | 9           |
| M06         | 23          | 2          | 6          | 2          | 3          | 5          | 18          |
| M07         | 32          | 2          | 5          | 3          | 1          | 2          | 13          |
| M08         | 21          | 3          | 6          | 4          | 1          | 2          | 16          |
| M09         | 30          | 6          | 6          | 4          | 3          | 6          | 25          |
| M10         | 22          | 0          | 5          | 4          | 0          | 3          | 12          |
| M11         | 31          | 2          | 4          | 7          | 1          | 7          | 21          |
| M12         | 25          | 2          | 2          | 8          | 0          | 3          | 15          |
| M13         | 21          | 1          | 4          | 0          | 1          | 1          | 7           |
| M14         | 20          | 5          | 6          | 3          | 3          | 4          | 21          |
| M15         | 22          | 3          | 5          | 1          | 2          | 6          | 17          |
| M16         | 22          | 3          | 6          | 2          | 2          | 6          | 19          |
| M17         | 24          | 6          | 7          | 5          | 6          | 4          | 28          |
| M18         | 23          | 3          | 2          | 4          | 2          | 4          | 15          |
| M19         | 21          | 5          | 4          | 5          | 3          | 2          | 19          |
| M20         | 27          | 7          | 4          | 4          | 4          | 4          | 23          |
| M21         | 27          | 3          | 6          | 3          | 7          | 3          | 22          |
| M22         | 26          | 3          | 4          | 4          | 1          | 3          | 15          |
| M23         | 35          | 5          | 6          | 2          | 6          | 4          | 23          |
| M24         | 20          | 1          | 4          | 2          | 2          | 1          | 10          |
| M25         | 26          | 5          | 4          | 2          | 2          | 4          | 17          |
| M26         | 27          | 5          | 1          | 3          | 3          | 3          | 17          |
| M27         | 22          | 4          | 4          | 0          | 2          | 3          | 13          |
| M28         | 22          | 2          | 4          | 6          | 3          | 1          | 16          |
| M29         | 21          | 1          | 6          | 3          | 3          | 3          | 16          |
| M30         | 27          | 3          | 7          | 2          | 2          | 4          | 18          |
| M31         | 22          | 4          | 6          | 4          | 2          | 2          | 18          |
| M32         | 19          | 1          | 3          | 3          | 0          | 3          | 10          |
| M33         | 25          | 2          | 0          | 4          | 0          | 3          | 9           |
| M34         | 23          | 6          | 4          | 4          | 4          | 0          | 18          |
| M35         | 31          | 4          | 5          | 0          | 4          | 4          | 17          |
| M36         | 25          | 2          | 2          | 2          | 0          | 2          | 8           |
| M37         | 29          | 4          | 5          | 6          | 4          | 4          | 23          |
| M38         | 25          | 4          | 3          | 4          | 0          | 6          | 17          |
| M39         | 21          | 3          | 3          | 5          | 6          | 3          | 20          |
| M40         | 20          | 2          | 3          | 5          | 2          | 4          | 16          |
| M41         | 20          | 7          | 7          | 6          | 4          | 6          | 30          |
| M42         | 21          | 1          | 0          | 4          | 0          | 1          | 6           |
| M43         | 20          | 2          | 5          | 7          | 2          | 4          | 20          |
| <b>Mean</b> | <b>23.8</b> | <b>3.3</b> | <b>4.4</b> | <b>3.8</b> | <b>2.5</b> | <b>3.5</b> | <b>17.5</b> |

| Female      | AGE         | AQ-S       | AQ-AS      | AQ-AD      | AQ-C       | AQ-I       | AQTotal     |
|-------------|-------------|------------|------------|------------|------------|------------|-------------|
| F01         | 21          | 0          | 1          | 2          | 1          | 1          | 5           |
| F02         | 22          | 2          | 3          | 4          | 3          | 4          | 16          |
| F03         | 22          | 1          | 4          | 2          | 3          | 1          | 11          |
| F04         | 28          | 0          | 3          | 3          | 0          | 2          | 8           |
| F05         | 25          | 3          | 0          | 0          | 2          | 5          | 10          |
| F06         | 24          | 4          | 3          | 4          | 2          | 3          | 16          |
| F07         | 22          | 6          | 7          | 5          | 6          | 3          | 27          |
| F08         | 39          | 2          | 4          | 1          | 2          | 4          | 13          |
| F09         | 20          | 5          | 2          | 1          | 6          | 4          | 18          |
| F10         | 24          | 5          | 5          | 4          | 3          | 2          | 19          |
| F11         | 27          | 2          | 2          | 1          | 0          | 0          | 5           |
| F12         | 24          | 8          | 7          | 4          | 9          | 4          | 32          |
| F13         | 22          | 0          | 3          | 3          | 3          | 1          | 10          |
| F14         | 20          | 0          | 4          | 10         | 2          | 2          | 18          |
| F15         | 30          | 7          | 9          | 7          | 7          | 2          | 32          |
| F16         | 20          | 1          | 2          | 8          | 1          | 2          | 14          |
| F17         | 22          | 0          | 2          | 6          | 2          | 1          | 11          |
| F18         | 28          | 5          | 2          | 1          | 6          | 1          | 15          |
| F19         | 21          | 4          | 3          | 5          | 2          | 1          | 15          |
| F20         | 20          | 4          | 5          | 5          | 3          | 2          | 19          |
| F21         | 22          | 4          | 5          | 3          | 2          | 2          | 16          |
| F22         | 22          | 3          | 7          | 3          | 1          | 2          | 16          |
| F23         | 22          | 2          | 6          | 2          | 2          | 2          | 14          |
| F24         | 20          | 3          | 5          | 2          | 4          | 2          | 16          |
| F25         | 21          | 6          | 6          | 8          | 6          | 1          | 27          |
| F26         | 19          | 7          | 8          | 3          | 5          | 2          | 25          |
| F27         | 21          | 3          | 4          | 4          | 1          | 1          | 13          |
| F28         | 20          | 0          | 5          | 2          | 0          | 3          | 10          |
| F29         | 20          | 4          | 7          | 1          | 3          | 2          | 17          |
| F30         | 18          | 2          | 6          | 6          | 2          | 2          | 18          |
| F31         | 20          | 0          | 3          | 3          | 1          | 1          | 8           |
| F32         | 18          | 1          | 4          | 6          | 0          | 2          | 13          |
| F33         | 18          | 0          | 1          | 8          | 0          | 2          | 11          |
| F34         | 18          | 0          | 6          | 2          | 5          | 2          | 15          |
| F35         | 22          | 1          | 6          | 4          | 3          | 1          | 15          |
| F36         | 22          | 3          | 6          | 2          | 4          | 2          | 17          |
| F37         | 25          | 1          | 2          | 3          | 2          | 2          | 10          |
| F38         | 21          | 1          | 3          | 3          | 2          | 3          | 12          |
| F39         | 18          | 0          | 3          | 2          | 0          | 0          | 5           |
| F40         | 18          | 0          | 3          | 7          | 0          | 1          | 11          |
| F41         | 22          | 6          | 3          | 2          | 4          | 1          | 16          |
| F42         | 32          | 1          | 4          | 1          | 2          | 0          | 8           |
| <b>Mean</b> | <b>22.4</b> | <b>2.5</b> | <b>4.1</b> | <b>3.6</b> | <b>2.7</b> | <b>1.9</b> | <b>15.0</b> |
